# Supplementary material for: Transfection of Capsaspora owczarzaki, a close unicellular relative of animals
Source: PubMed Central journal article supplement (PMC6001378; doi:10.1242/dev.162107), 2018-05-23
Supplement: develop-145-162107-s1.pdf [file develop-145-162107-s1.pdf]

## Supplementary Materials and Methods

### Transfection of *Capsaspora* using Calcium-phosphate precipitation

Adherent stage cells at the exponential growth phase were obtained after a two-day culture passage as follows. Two days before transfection,  $1 \times 10^7$  cells were seeded in a 25 cm<sup>2</sup> culture flask containing 5 mL growth medium and grown overnight at 23°C (Fig. 1A-1). Hereafter, all amounts are indicated per well.

At day 0,  $2 \times 10^6$  cells were seeded from this previous confluent culture to attain 90-95% cell confluence at the time of transfection. Cells were seeded in a 12-well plate (Nunc/DDBioLab #55428) containing 600 µL growth medium and grown overnight at 23°C (Fig. 1A-2). Cell concentration was determined using a Neubauer Chamber Hemocytometer (DDBiolab #900505).

**▲ CRITICAL STEP: Adherent stage cells in confluency.** Cultures should be fresh to maximize transfection efficiency. Ideally, they should be maintained weekly, and used for transfection at their exponential growth phase. Do not let cultures reach higher cell densities ( $< 5 \times 10^7$  cells mL<sup>-1</sup>).

At day 1, growth medium was replaced by 600 µL of transfection medium (see Reagent preparation), and incubated for 30 min at room temperature (~18°C) (Fig. 1B-3). During incubation, 1.271 pmols of plasmid DNA for single transfection experiments or 0.636 pmols of each plasmid DNA for co-transfection experiments were diluted in sterile distilled water up to 120 µL plus an additional volume of 150 µL of 2X HBS Buffer. Next, 30 µL of 1.25 M CaCl<sub>2</sub> were added dropwise while flickering the tube carefully, reaching a final DNA mix volume of 300 µL. DNA mix was inverted immediately two times to ensure proper mixing of reagents and incubated 10 min at 37°C (Fig. 1B-4). After incubation, transfection medium was removed and the DNA mix was added dropwise in the centre of the wells. Cells:DNA mix were incubated for 30 min at 18°C (Fig. 1B-5).

**▲ CRITICAL STEP: DNA-Calcium-phosphate precipitates formation.** Check the cultures periodically under the microscope to check crystal size. Big cloudy precipitates may compromise transfection efficiency. Instead, verify that small grains of refractant material are spread homogeneously in the plate.

After this period, an additional volume of 500 µL of transfection medium was added and cells were incubated for a minimum of 4 h at 23°C (Fig. 1B-6).

**▲ NOTE: Transfection medium incubation.** An incubation of less than 4 h yields lower transfection efficiency. This incubation time can be extended to 6 h.

After incubation, the medium was removed and an osmotic shock using 110  $\mu$ L 10% (v/v) glycerol in 1X HBS Buffer was performed, pouring the solution dropwise all over the well for one min at  $\sim$ 18°C (Fig. 1B-7).

**▲ CRITICAL STEP: Glycerol shock.** *Incubation with glycerol at this concentration should not exceed 1 min, counting from the first droplet, to avoid excessive cell death.*

After the osmotic shock, glycerol solution was removed and cells were grown at 23°C overnight with 700  $\mu$ L of growth medium (Fig. 1B-8). Screening of positive cells was performed 18 h post-transfection using fluorescence microscopy and flow cytometry analysis (Fig. 1C).

**▲ NOTE: Controls.** pONSY (empty) transfected cells, mock-transfected cells and non-transfected cells were used as controls.

## Transfection Reagents preparation

**Growth medium (for 1 L):** 10 g Peptone (BD, #211677), 10 g Yeast Extract (BD, #212750), 1 g Yeast nucleic acid (Ribonucleic Acid, Type VI from Torula Yeast) (Sigma, #R-6625), 15 mg Folic acid (Sigma, #F8758) in 880 mL distilled water. Autoclave for 15 min at 121°C. Cool down and aseptically add 0.4 mL of Hemin stock solution\* (Sigma, #H9039), 20 mL Buffer solution\*\* and 100 mL of heat-inactivated Fetal Bovine Serum (Sigma, #F9665-100ml). Filter-sterilise through 0.22 µm and store at 4°C.

**\*Hemin stock solution (for 200 mL):** 400 mg NaOH in 200 mL dH<sub>2</sub>O. Add 500 mg of Hemin and autoclave 20 min at 121°C. Store at 4°C protected from the light.

**\*\*Buffer solution (for 1 L):** 18.1 g KH<sub>2</sub>PO<sub>4</sub> (Sigma, #P5655), 25 g Na<sub>2</sub>HPO<sub>4</sub> (Sigma, #S5136) in 1 L distilled water. Adjust final pH to 6.5 with HCl 37% and filter-sterilise through 0.22 µm. Store at 4°C.

**Transfection medium (for 1 L):** 10 g Peptone, 15 mg Folic Acid in 990 mL distilled water. Autoclave for 20 min at 121°C. Aseptically add 10 mL HEPES 1 M (Sigma, #H4034) to a final concentration of 10 mM and 2.1 g Bis-Tris methane (Sigma, #B9754) final concentration 0.21% w/w. adjust pH to 7.1 with NaOH, filter-sterilise through 0.22 µm and store at 4°C.

**2X HBS (for 250 mL):** Dissolve 4 g NaCl (Sigma, #S3014), 0.18 g KCl (Sigma, #P9541), 0.05 g Na<sub>2</sub>HPO<sub>4</sub> (Sigma, #S5136), 2.5 g HEPES and 0.5 g D-glucose (Sigma, #G8270) in autoclaved distilled water. Adjust pH to 7.1 with NaOH. Filter-sterilise through 0.22 µm, flash-freeze with liquid Nitrogen and store at -80°C.

**1.25M CaCl<sub>2</sub> (for 10 mL):** 1.84 g CaCl<sub>2</sub> (Sigma, #C1016) in 10 mL autoclaved distilled water. Filter-sterilise through 0.22 µm, flash-freeze with liquid Nitrogen and store at -80°C.

**10% glycerol (for 4 mL):** 0.8 mL of filter-sterilised 50% (v/v) glycerol (Sigma, #G7757) in 1.2 mL autoclaved distilled water and 2 mL 2X HBS. Filter-sterilise through 0.22 µm, flash-freeze with liquid Nitrogen and store at -80°C.

## Supplementary Figures

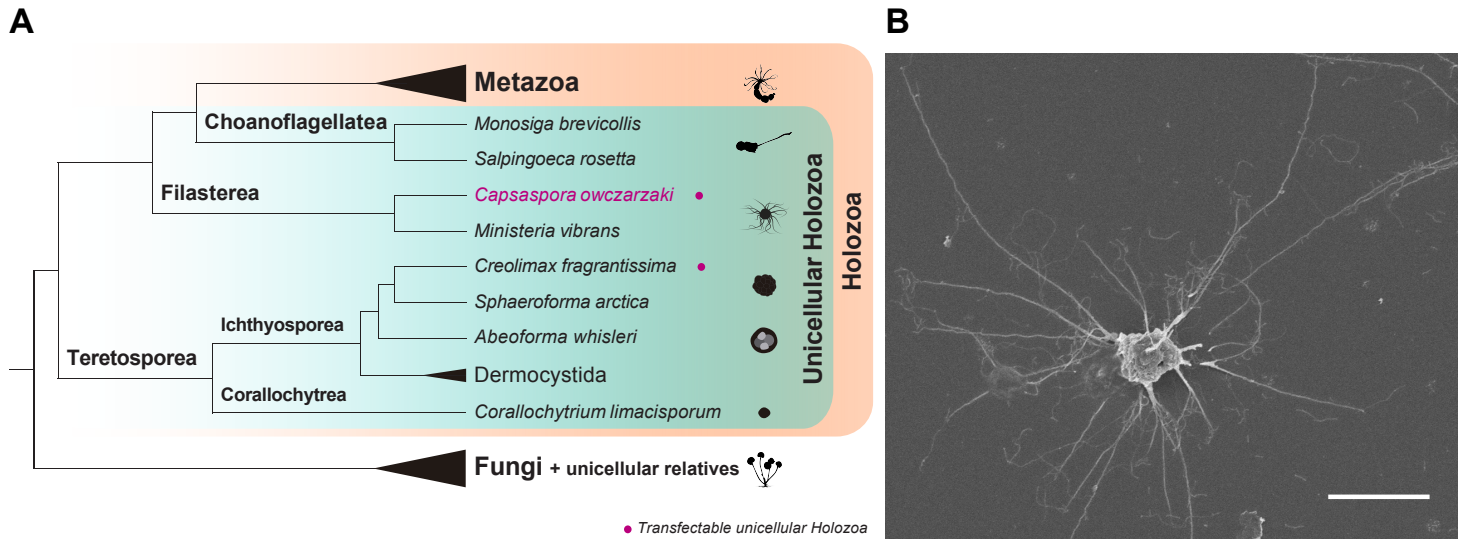

**Fig. S1. Transfectable unicellular Holozoa and *Capsaspora owczarzaki*.** (A) Metazoa and their unicellular relatives; Choanoflagellata, Filasterea and Teretosporea, comprise the Holozoa clade. Transfectable unicellular Holozoa to date are *C. fragrantissima* and *C. owczarzaki*. (B) SEM image of a *Capsaspora* cell. Scale bar represents 5  $\mu$ m.

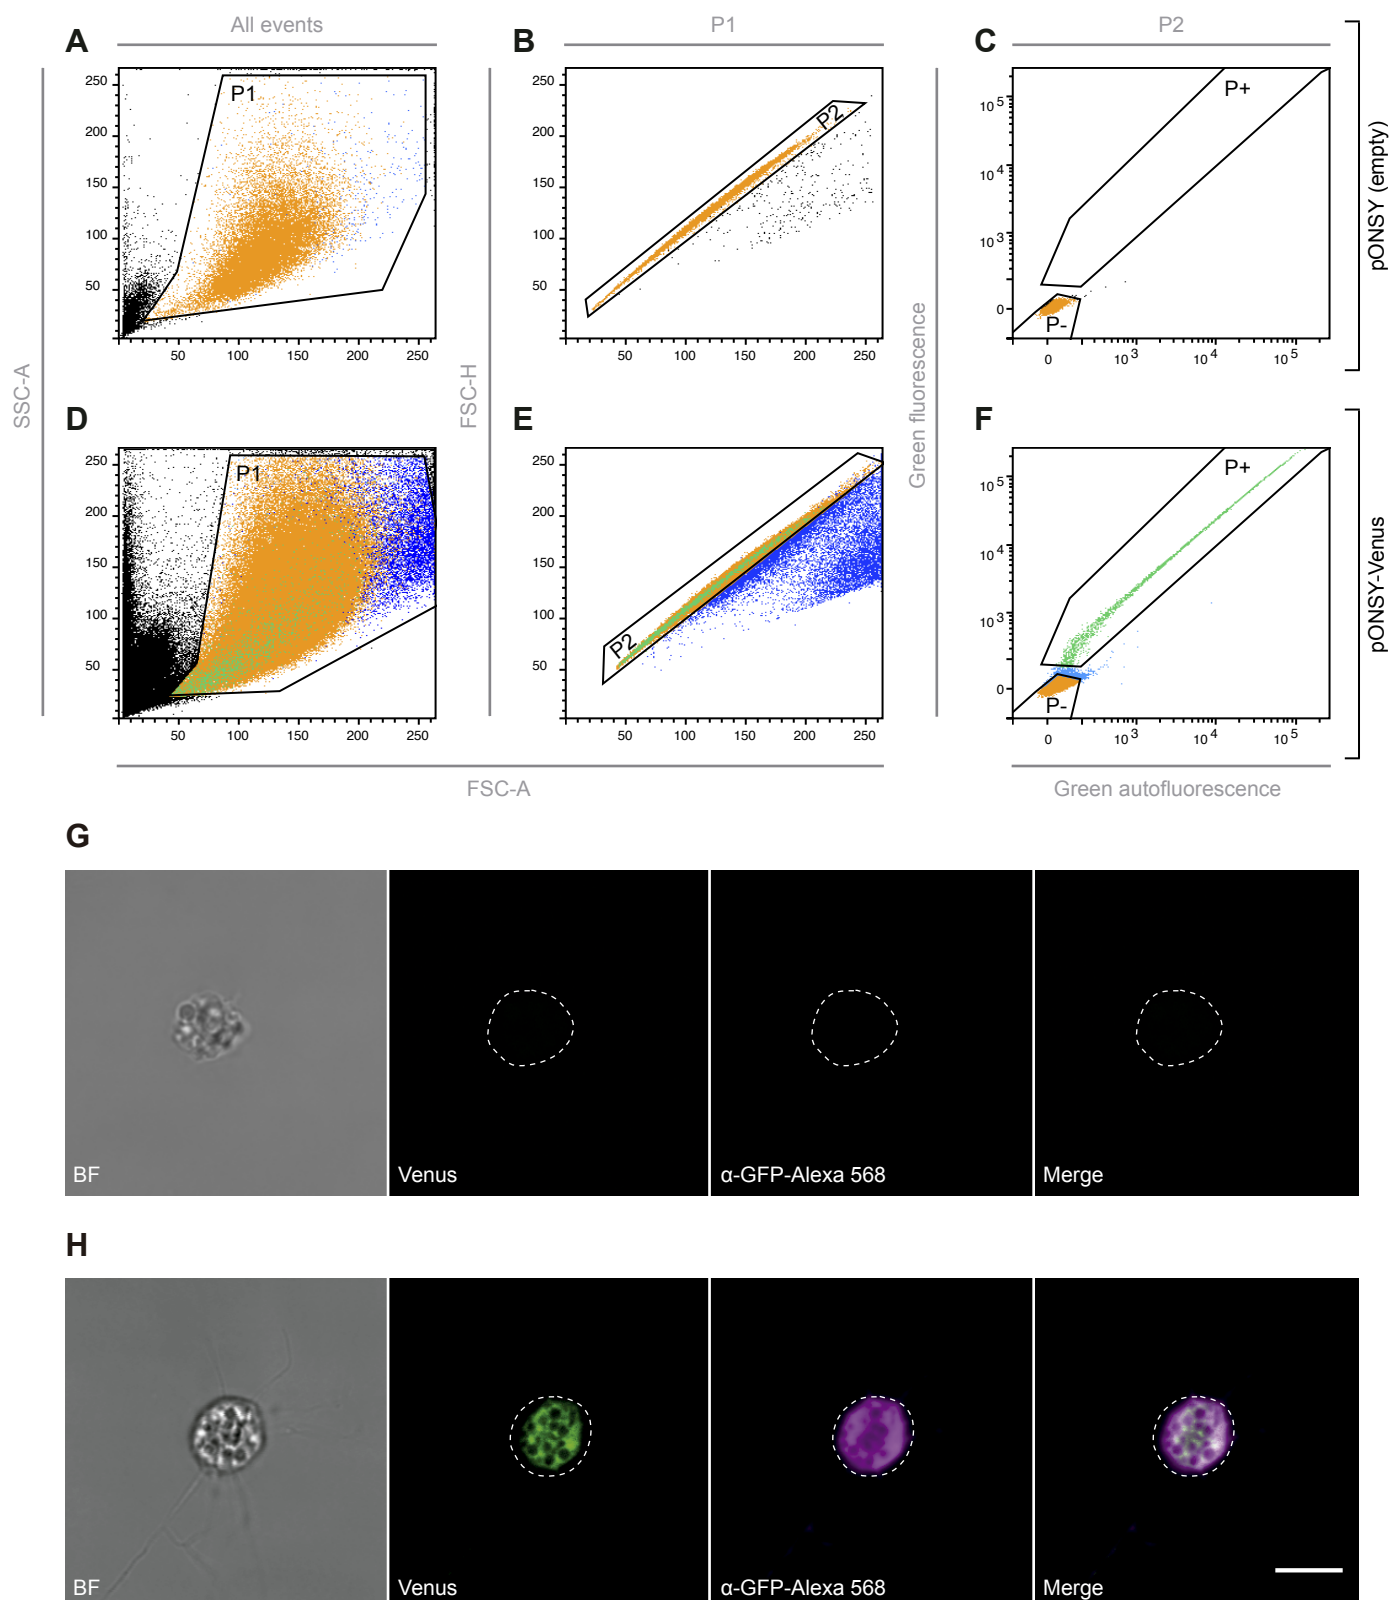

**Fig. S2. FACS of *Capsaspora* transfected cells and immunofluorescence validation.** (A-C) Cells transfected with pONSY (empty) as control to gate positive and negative populations. (D-F) Cells transfected with pONSY-Venus. Areas selected in (A) and (D) define total population of cells (P1). Areas selected in (B) and (E) define single cells (P2). Areas in (C) and (F) define sorted Venus positive cells (P+) and sorted Venus negative cells (P-), respectively. (G-H) Immunofluorescence validation of Venus expression of P- (G) and P+ (H) sorted populations from (F) using an anti-GFP antibody. Dashed line indicates cell body. Scale bar represents 5  $\mu$ m.

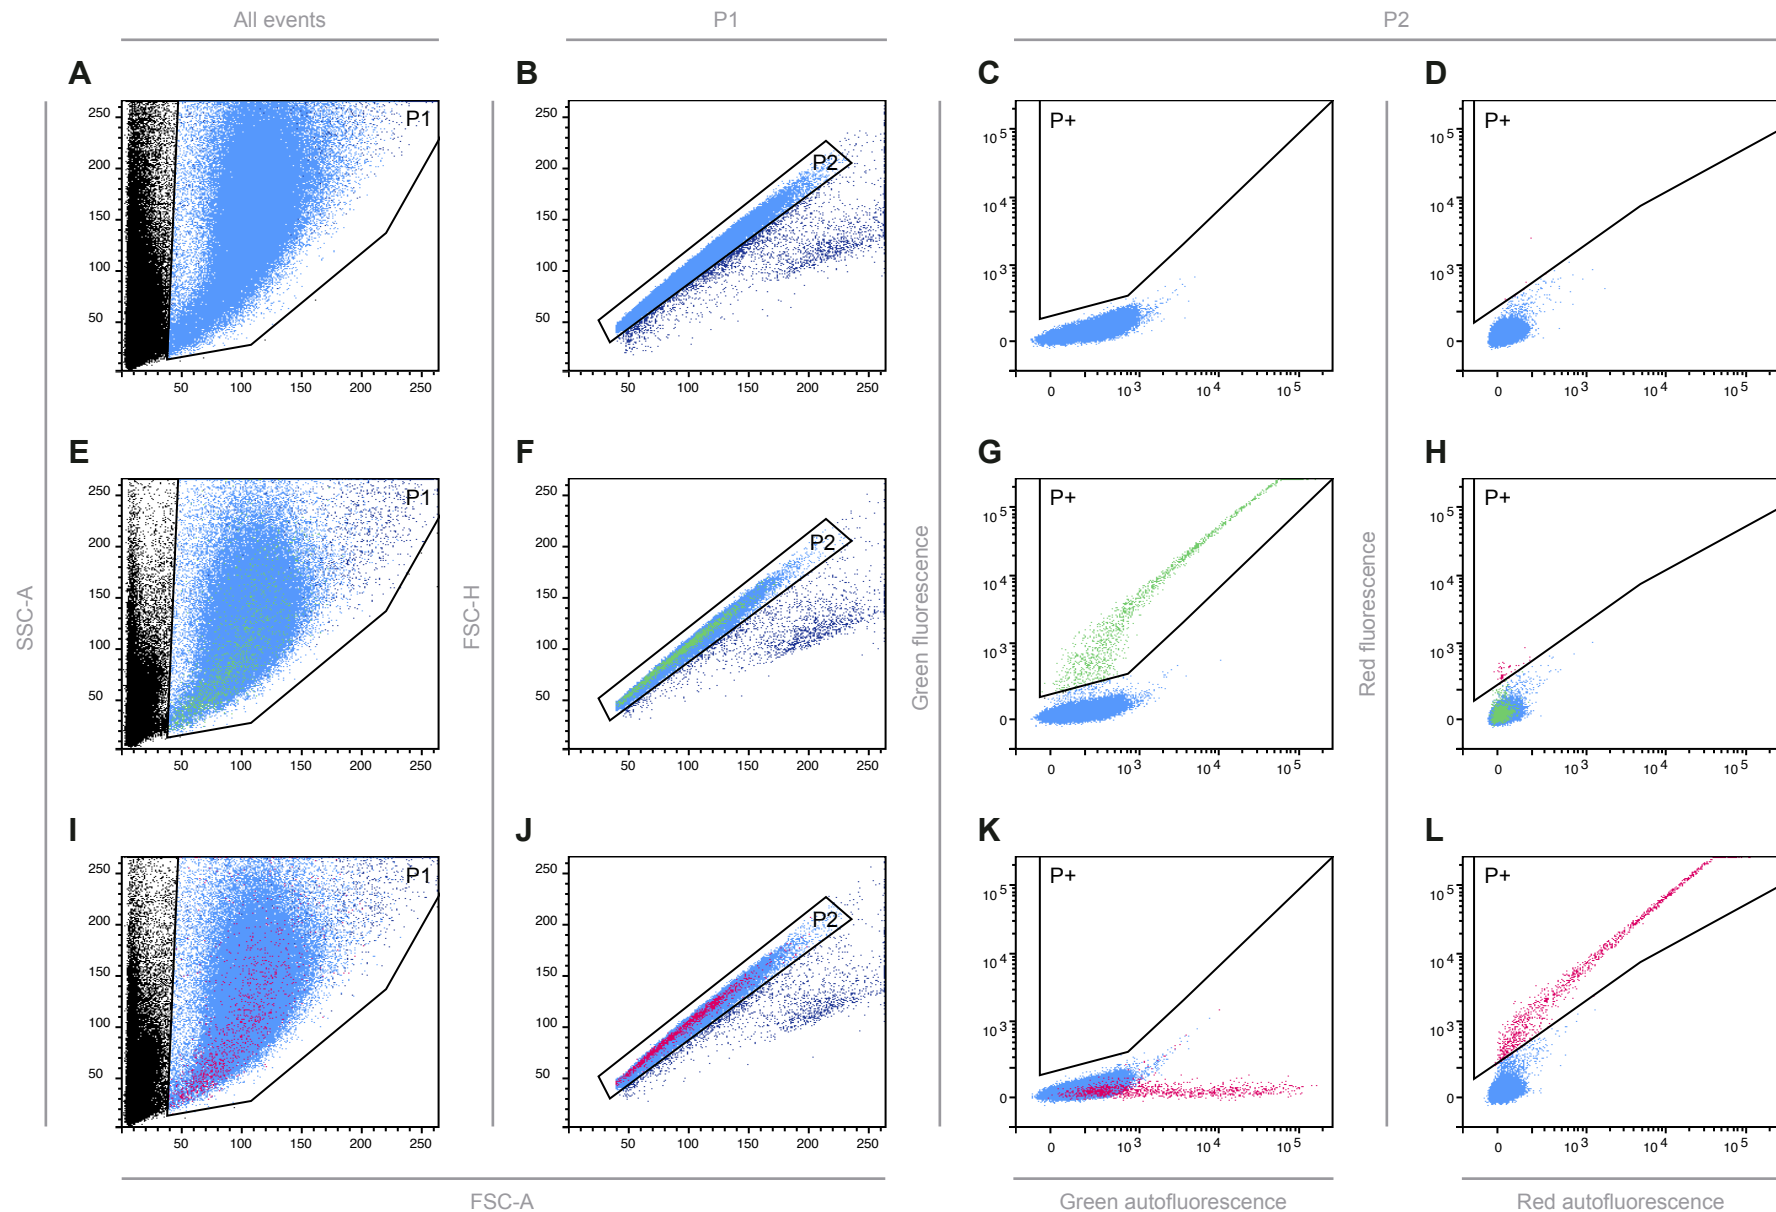

**Fig. S3. Flow cytometry analysis of *Capsaspora* transfected cells.** (A-D) Cells transfected with pONSY (empty) as control to gate positive and negative populations. (E-H) Cells transfected with pONSY-Venus. (I-L) Cells transfected with pONSY-mCherry. Areas selected in A, E and I define total population of cells (P1). Areas selected in B, F and J define single cells (P2). P+ in C, G and K defines positive cells in the green channel (Venus). P+ in D, H and L defines positive cells in the red channel (mCherry). Figure associated to Fig. 3A-B.

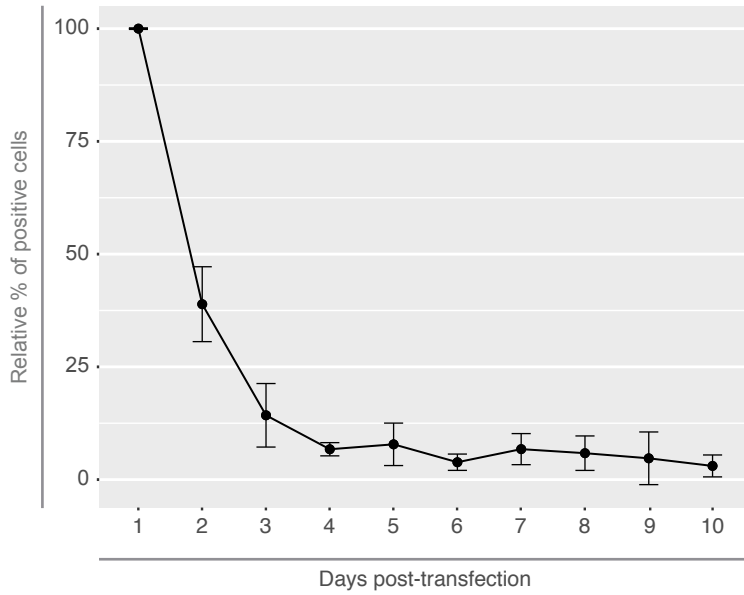

**Fig. S4: Persistence of positive cells along 10 days after transfection.** Percentage of positive cells transfected with pONSY-Venus, measured every 24h by flow cytometry (number of positive cells at day 1 was considered as 100%). Error bars represent s.d. Figure associated to Table S2.

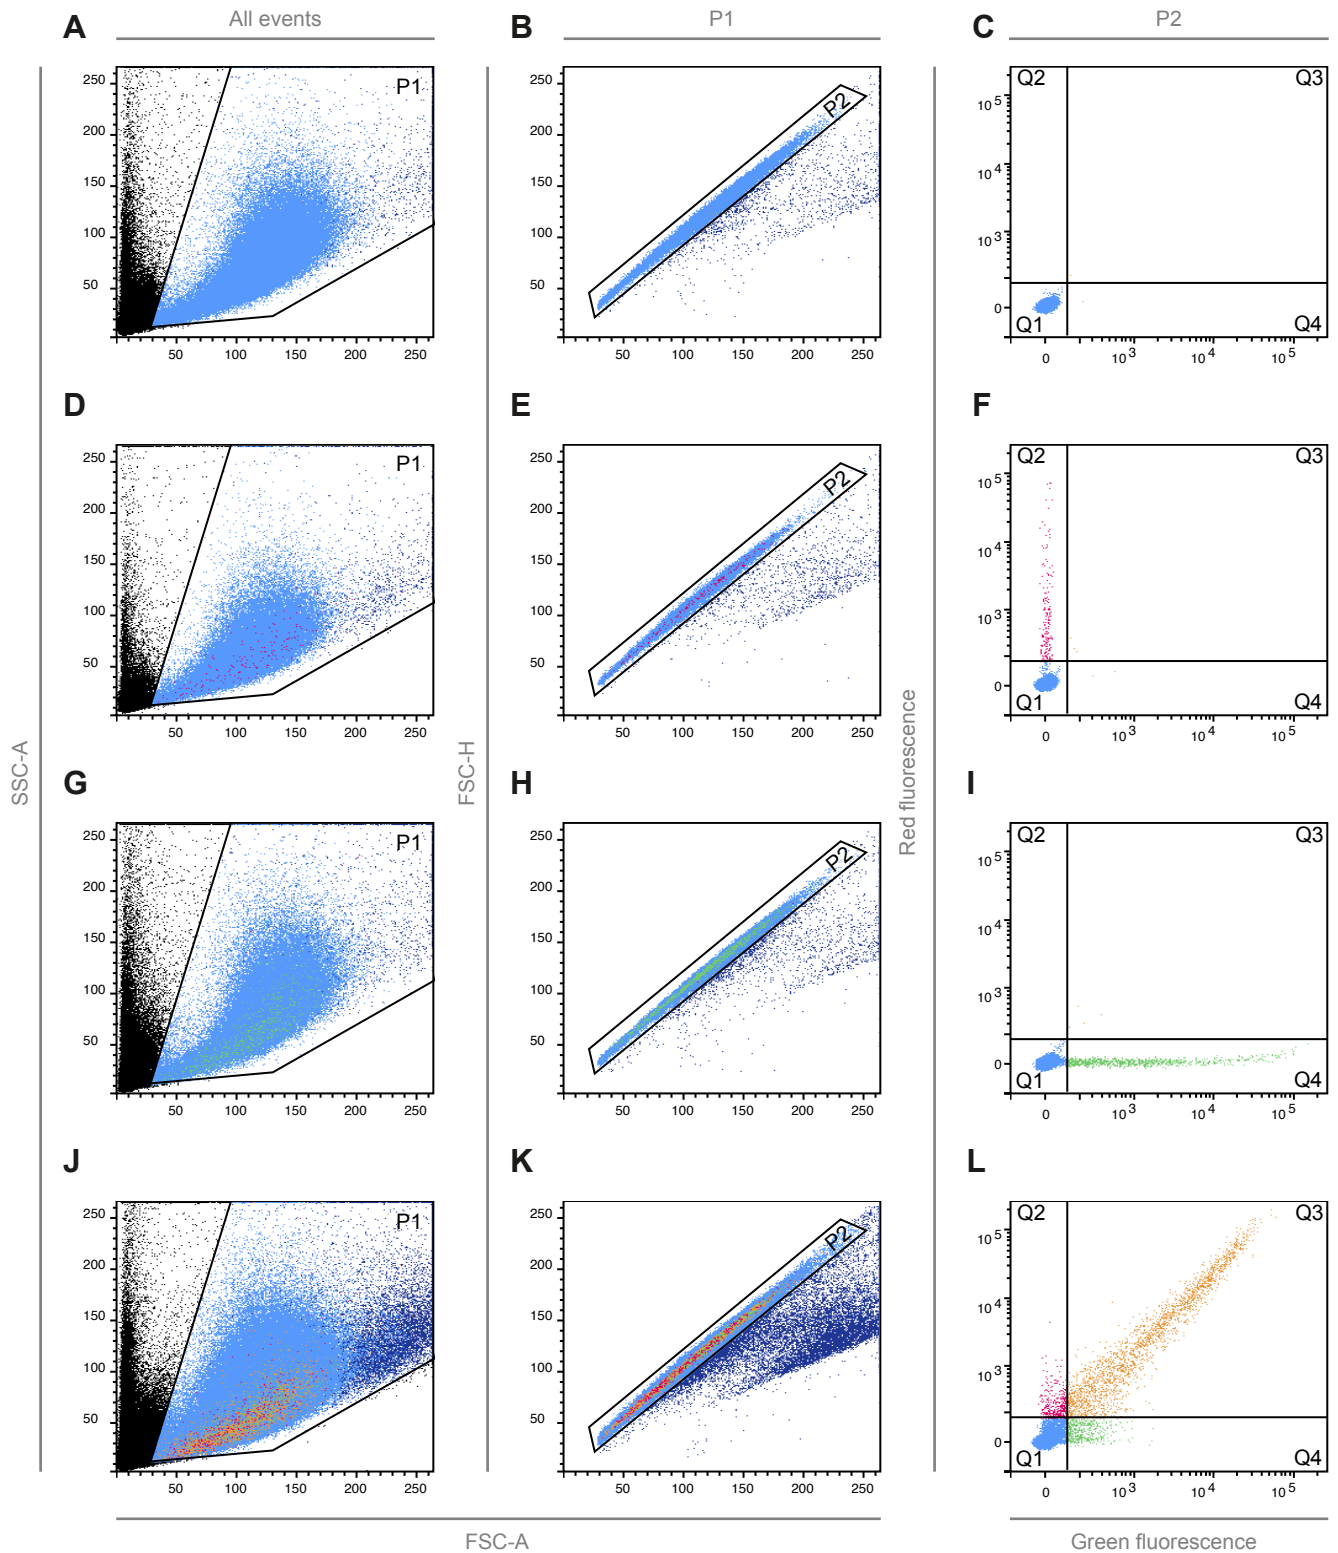

**Fig. S5: *Capsaspora* co-transfected with both pONSY-mCherry and pONSY-Venus.** (A-C) Cells transfected with pONSY (empty) as control. (D-F) Cells transfected with pONSY-mCherry only. (G-H) Cells transfected with pONSY-Venus only. (J-L) Cells co-transfected with both pONSY-mCherry and pONSY-Venus. Areas selected in panels A,D,G and J define total population of cells (P1). Areas selected in B, E, H, and K define single cells (P2). Quartiles define negative cells (Q1), red fluorescent cells expressing mCherry only (Q2), cells expressing both fluorescent proteins (Q3) and green fluorescent cells expressing Venus only (Q4). Figure associated to Fig. 3F.



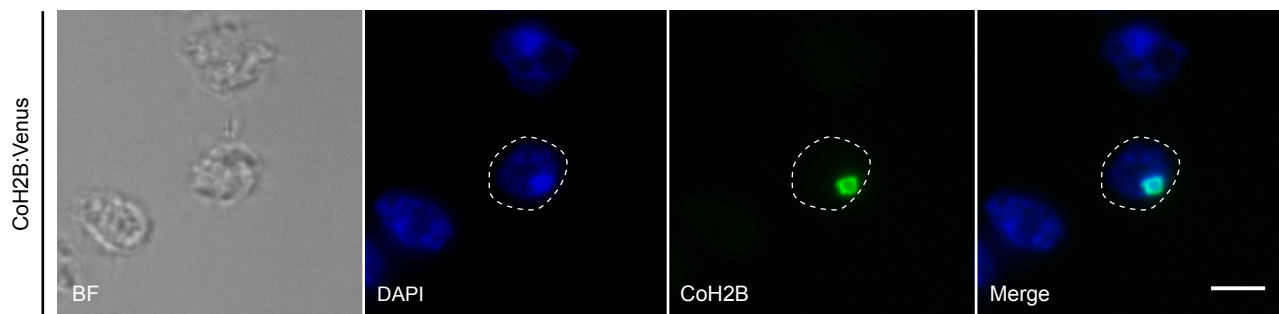

**Fig. S6. Localisation of nuclear marker in *Capsaspora* transfected cells.** Transfected cells with pONSY-CoH2B:Venus stained with DAPI. Dashed line indicates cell body. Scale bar represents 5  $\mu$ m.

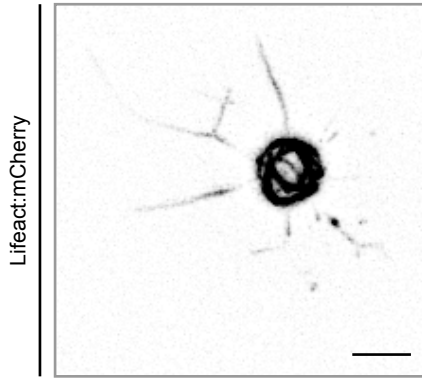

**Fig. S7. Labelling the actin cytoskeleton and filopodia in *Capsaspora*.** Transfected cell with pONSY-Lifeact:mCherry from Fig. 2C'. Image saturated and inverted to improve visualization of filopodia. Scale bar represents 5  $\mu\text{m}$ .

## Supplementary movies

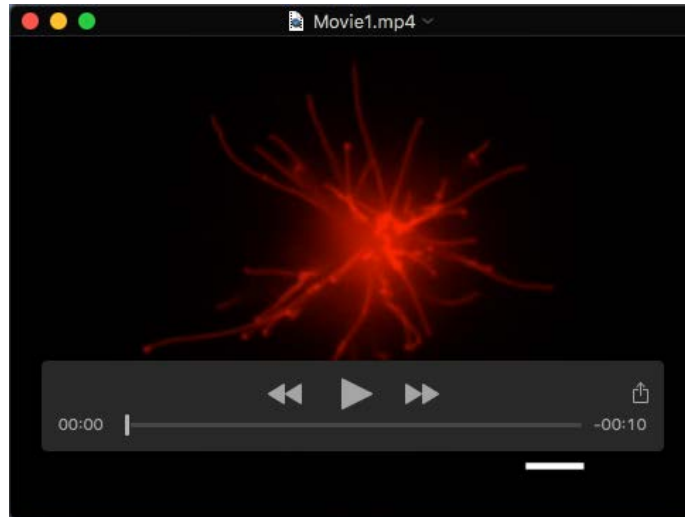

**Movie 1. *Capsaspora* filopodia dynamics *in vivo*.** Time-lapse of a cell transfected with pONSY:CoNMM-mCherry. Images were taken every second during 100 seconds. Scale bar represents 5  $\mu$ m.

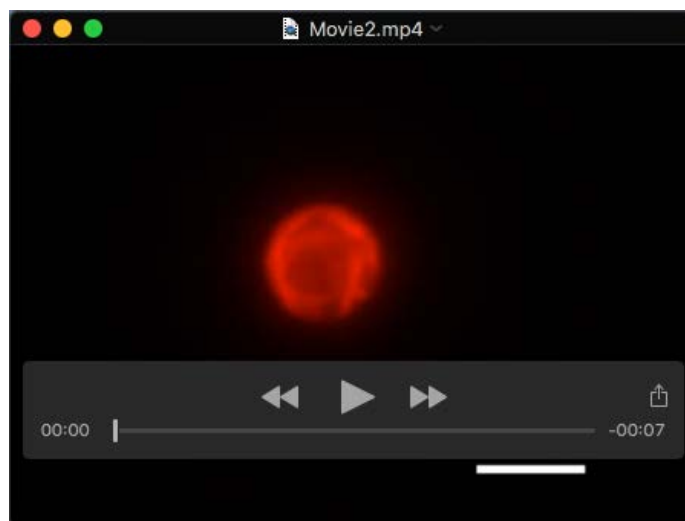

**Movie 2. *Capsaspora* actin cytoskeleton *in vivo*.** Time-lapse of a cell transfected with pONSY:Lifect-mCherry. Images were taken every 10 minutes during 130 minutes. Scale bar represents 5  $\mu$ m.

## Supplementary Tables

### Tables S1-S4

**Table S1. Flow Cytometry analysis of *Capsaspora* cells transfected with a single vector.** Flow cytometry analysis of *Capsaspora* cells transfected with pONSY-Venus (1-7a) or pONSY-mCherry (7b) expression vectors. Results from 7 independent experiments with at least 6 replicates each (n=51) are shown. Transfection efficiency is calculated as the ratio of total number of positive cells (P+) from total number of cells (P2) and represented as mean $\pm$ s.d per experiment. Table associated to Fig. 3A-D and Fig. S3.

| Experiment |              | Number of cells |               | Transfection efficiency |                   |
|------------|--------------|-----------------|---------------|-------------------------|-------------------|
| Number     | Sample       | Total (P2)      | Positive (P+) | (P+/P2)%                | mean $\pm$ s.d.   |
| 1          | Empty vector | 100083          | 0             | 0.000                   | 0.347 $\pm$ 0.193 |
|            | Replicate 1  | 100152          | 370           | 0.369                   |                   |
|            | Replicate 2  | 100036          | 512           | 0.512                   |                   |
|            | Replicate 3  | 100147          | 633           | 0.632                   |                   |
|            | Replicate 4  | 100302          | 219           | 0.218                   |                   |
|            | Replicate 5  | 99930           | 150           | 0.150                   |                   |
|            | Replicate 6  | 100055          | 200           | 0.200                   |                   |
| 2          | Empty vector | 100000          | 0             | 0.000                   | 2.083 $\pm$ 0.248 |
|            | Replicate 1  | 47180           | 1139          | 2.414                   |                   |
|            | Replicate 2  | 52604           | 1178          | 2.239                   |                   |
|            | Replicate 3  | 91753           | 1632          | 1.779                   |                   |
|            | Replicate 4  | 100000          | 2114          | 2.114                   |                   |
|            | Replicate 5  | 100000          | 2146          | 2.146                   |                   |
|            | Replicate 6  | 100000          | 1807          | 1.807                   |                   |

|   |              |        |      |       |             |
|---|--------------|--------|------|-------|-------------|
| 3 | Empty vector | 100000 | 0    | 0.000 | -           |
|   | Replicate 1  | 100000 | 814  | 0.814 |             |
|   | Replicate 2  | 100000 | 1332 | 1.332 |             |
|   | Replicate 3  | 100000 | 673  | 0.673 |             |
|   | Replicate 4  | 100000 | 820  | 0.820 |             |
|   | vReplicate 5 | 100000 | 950  | 0.950 | 0.859±0.227 |
|   | Replicate 6  | 100000 | 827  | 0.827 |             |
|   | Replicate 7  | 100000 | 669  | 0.669 |             |
|   | Replicate 8  | 100000 | 1051 | 1.051 |             |
|   | Replicate 9  | 100000 | 596  | 0.596 |             |
| 4 | Empty vector | 100003 | 6    | 0.006 | -           |
|   | Replicate 1  | 100000 | 1250 | 1.250 |             |
|   | Replicate 2  | 100000 | 1091 | 1.091 |             |
|   | Replicate 3  | 100000 | 1103 | 1.103 |             |
|   | Replicate 4  | 100000 | 1049 | 1.049 | 1.047±0.140 |
|   | Replicate 5  | 100000 | 849  | 0.849 |             |
|   | Replicate 6  | 100000 | 938  | 0.938 |             |

|    |              |        |      |       |             |
|----|--------------|--------|------|-------|-------------|
| 5  | Empty vector | 100229 | 9    | 0.009 | -           |
|    | Replicate 1  | 100206 | 1048 | 1.046 |             |
|    | Replicate 2  | 100062 | 1352 | 1.351 |             |
|    | Replicate 3  | 100070 | 1160 | 1.159 | 1.204±0.128 |
|    | Replicate 4  | 100075 | 1368 | 1.367 |             |
|    | Replicate 5  | 100067 | 1123 | 1.122 |             |
|    | Replicate 6  | 100055 | 1182 | 1.181 |             |
| 6  | Empty vector | 100000 | 0    | 0.000 | -           |
|    | Replicate 1  | 100000 | 944  | 0.944 |             |
|    | Replicate 2  | 100000 | 472  | 0.472 |             |
|    | Replicate 3  | 100000 | 1681 | 1.681 | 1.399±0.621 |
|    | Replicate 4  | 100000 | 1802 | 1.802 |             |
|    | Replicate 5  | 100000 | 2182 | 2.182 |             |
|    | Replicate 6  | 100000 | 1315 | 1.315 |             |
| 7a | Empty vector | 12243  | 0    | 0.000 | -           |
|    | Replicate 1  | 86084  | 1134 | 1.317 |             |
|    | Replicate 2  | 100000 | 559  | 0.559 |             |
|    | Replicate 3  | 100000 | 1469 | 1.469 | 1.159±0.326 |
|    | Replicate 4  | 100000 | 1376 | 1.376 |             |
|    | Replicate 5  | 100000 | 1129 | 1.129 |             |
|    | Replicate 6  | 100000 | 1101 | 1.101 |             |
| 7b | Empty vector | 12243  | 0    | 0.000 | -           |
|    | Replicate 1  | 100000 | 980  | 0.980 |             |
|    | Replicate 2  | 100000 | 1151 | 1.151 |             |
|    | Replicate 3  | 100000 | 1284 | 1.284 | 1.094±0.148 |
|    | Replicate 4  | 100000 | 1118 | 1.118 |             |
|    | Replicate 5  | 100000 | 1163 | 1.163 |             |
|    | Replicate 6  | 100000 | 865  | 0.865 |             |

**Table S2. Flow Cytometry analysis of *Capsaspora* transfected cells during 10 days.** Cells transfected with pONSY-Venus expression vector analysed every 24 hours during 10 days after transfection. Results from 3 independent experiments are shown. Transfection efficiency was calculated as the ratio of total number of positive cells (P+) from total number of cells (P2). Ratio of positive cells was calculated as the percentage of positive cells in a particular day relative to the percentage of positive cells at day 1 and represented as mean $\pm$ s.d per day. Table associated to Fig. S4.

| Experiment             |              | Number of cells |               | Transfection efficiency |         |                     |
|------------------------|--------------|-----------------|---------------|-------------------------|---------|---------------------|
| Days post-transfection | Sample       | Total (P2)      | Positive (P+) | (P+/P2)%                | Ratio % | mean $\pm$ s.d.     |
| 1                      | Empty vector | 21427           | 0             | 0.000                   | -       | -                   |
|                        | Replicate 1  | 295873          | 313           | 0.106                   | 100.000 |                     |
|                        | Replicate 2  | 99871           | 338           | 0.338                   | 100.000 | 100.000 $\pm$ 0.000 |
|                        | Replicate 3  | 99968           | 79            | 0.079                   | 100.000 |                     |
| 2                      | Empty vector | 99944           | 0             | 0.000                   | -       | -                   |
|                        | Replicate 1  | 99962           | 32            | 0.032                   | 30.260  |                     |
|                        | Replicate 2  | 99955           | 134           | 0.134                   | 39.612  | 38.898 $\pm$ 8.303  |
|                        | Replicate 3  | 100000          | 37            | 0.037                   | 46.820  |                     |
| 3                      | Empty vector | 99962           | 1             | 0.001                   | -       | -                   |
|                        | Replicate 1  | 100000          | 22            | 0.022                   | 20.796  |                     |
|                        | Replicate 2  | 99953           | 23            | 0.023                   | 6.799   | 14.260 $\pm$ 7.044  |
|                        | Replicate 3  | 100000          | 12            | 0.012                   | 15.185  |                     |
| 4                      | Empty vector | 100000          | 0             | 0.000                   | -       | -                   |
|                        | Replicate 1  | 100000          | 8             | 0.008                   | 7.562   |                     |
|                        | Replicate 2  | 99705           | 17            | 0.017                   | 5.038   | 6.731 $\pm$ 1.466   |
|                        | Replicate 3  | 100000          | 6             | 0.006                   | 7.593   |                     |
| 5                      | Empty vector | 100000          | 0             | 0.000                   | -       | -                   |
|                        | Replicate 1  | 100000          | 8             | 0.008                   | 7.562   |                     |
|                        | Replicate 2  | 99942           | 11            | 0.011                   | 3.252   | 7.823 $\pm$ 4.706   |
|                        | Replicate 3  | 100000          | 10            | 0.010                   | 12.654  |                     |

|    |              |        |    |       |        |             |
|----|--------------|--------|----|-------|--------|-------------|
| 6  | Empty vector | 100000 | 0  | 0.000 | -      | -           |
|    | Replicate 1  | 100000 | 5  | 0.005 | 4.726  |             |
|    | Replicate 2  | 99946  | 6  | 0.006 | 1.744  | 3.854±1.809 |
|    | Replicate 3  | 100000 | 4  | 0.004 | 5.062  |             |
| 7  | Empty vector | 100000 | 0  | 0.000 | -      | -           |
|    | Replicate 1  | 100000 | 11 | 0.011 | 10.398 |             |
|    | Replicate 2  | 99973  | 12 | 0.012 | 3.547  | 6.757±3.446 |
|    | Replicate 3  | 100000 | 5  | 0.005 | 6.327  |             |
| 8  | Empty vector | 100000 | 0  | 0.000 | -      | -           |
|    | Replicate 1  | 100000 | 9  | 0.009 | 8.508  |             |
|    | Replicate 2  | 99947  | 5  | 0.005 | 1.478  | 5.859±3.822 |
|    | Replicate 3  | 100000 | 6  | 0.006 | 7.593  |             |
| 9  | Empty vector | 235982 | 0  | 0.000 | -      | -           |
|    | Replicate 1  | 100000 | 12 | 0.012 | 11.343 |             |
|    | Replicate 2  | 99983  | 1  | 0.001 | 0.296  | 4.723±5.841 |
|    | Replicate 3  | 100000 | 2  | 0.002 | 2.531  |             |
| 10 | Empty vector | 186504 | 1  | 0.001 | -      | -           |
|    | Replicate 1  | 100000 | 6  | 0.006 | 5.672  |             |
|    | Replicate 2  | 99709  | 3  | 0.003 | 0.889  | 3.031±2.430 |
|    | Replicate 3  | 100000 | 2  | 0.002 | 2.531  |             |



**Table S3. Flow Cytometry analysis of *Capsaspora* cells co-transfected with pONSY-Venus and pONSY-mCherry.** Results from 7 independent experiments with 6 replicates each (n=42) are shown. Transfection efficiency is calculated by total number of positive cells (Q2+Q3+Q4) from total number of cells (P2) and represented as mean±s.d per experiment. Relative percentages of Double, Venus and mCherry expression were calculated as number of double positive cells (Q2) or number of Venus positive cells (Q4) or number of mCherry positive cells (Q3) from total number of positive cells (Q2+Q3+Q4), respectively, and represented as mean±s.d per experiment. Table associated to Fig. 3F and G and Fig. S5.

| Experiment |                 | Number of cells |               |              |             |            |                           | Transfection efficiency |                   | Relative % over total number of positive cells |              |              |
|------------|-----------------|-----------------|---------------|--------------|-------------|------------|---------------------------|-------------------------|-------------------|------------------------------------------------|--------------|--------------|
| Number     | Sample          | Total (P2)      | Negative (Q1) | mCherry (Q2) | Double (Q3) | Venus (Q4) | Total positive (Q2+Q3+Q4) | % Total positive        | % Double (Q3/P2)% | % Double                                       | % Venus      | % mCherry    |
| 1          | Empty vector    | 100000          | 99996         | 1            | 2           | 1          | 4                         | 0.004                   |                   |                                                |              |              |
|            | Control Venus   | 100000          | 98177         | 1            | 2           | 1820       | 1823                      | 1.823                   |                   |                                                |              |              |
|            | Control mCherry | 100000          | 99689         | 310          | 1           | 0          | 311                       | 0.311                   |                   |                                                |              |              |
|            | Replicate 1     | 520488          | 516878        | 706          | 2346        | 558        | 3610                      | 0.694                   | 0.451             | 64.986                                         | 15.457       | 19.557       |
|            | Replicate 2     | 358753          | 355200        | 731          | 2354        | 468        | 3553                      | 0.990                   | 0.656             | 66.254                                         | 13.172       | 20.574       |
|            | Replicate 3     | 322368          | 319598        | 501          | 1818        | 451        | 2770                      | 0.859                   | 0.564             | 65.632                                         | 16.282       | 18.087       |
|            | Replicate 4     | 408411          | 404855        | 620          | 2339        | 597        | 3556                      | 0.871                   | 0.573             | 65.776                                         | 16.789       | 17.435       |
|            | Replicate 5     | 426129          | 422602        | 592          | 2357        | 578        | 3527                      | 0.828                   | 0.553             | 66.827                                         | 16.388       | 16.785       |
|            | Replicate 6     | 380788          | 377503        | 501          | 2305        | 479        | 3285                      | 0.863                   | 0.605             | 70.167                                         | 14.581       | 15.251       |
|            |                 | Mean±s.d.       |               |              |             |            |                           |                         | 0.851±0.095       | 0.567±0.068                                    | 66.607±1.850 | 15.445±1.364 |
| 2          | Empty vector    | 100000          | 99988         | 2            | 5           | 5          | 12                        | 0.012                   |                   |                                                |              |              |
|            | Control Venus   | 100000          | 98648         | 7            | 2           | 1343       | 1352                      | 1.352                   |                   |                                                |              |              |
|            | Control mCherry | 100000          | 98879         | 1116         | 2           | 3          | 1121                      | 1.121                   |                   |                                                |              |              |
|            | Replicate 1     | 209708          | 206792        | 191          | 2247        | 478        | 2916                      | 1.391                   | 1.071             | 77.058                                         | 16.392       | 6.550        |
|            | Replicate 2     | 249962          | 247044        | 230          | 2217        | 471        | 2918                      | 1.167                   | 0.887             | 75.977                                         | 16.141       | 7.882        |
|            | Replicate 3     | 231155          | 228463        | 180          | 2154        | 358        | 2692                      | 1.165                   | 0.932             | 80.015                                         | 13.299       | 6.686        |
|            | Replicate 4     | 342982          | 340145        | 222          | 2220        | 395        | 2837                      | 0.827                   | 0.647             | 78.252                                         | 13.923       | 7.825        |
|            | Replicate 5     | 231457          | 228666        | 222          | 2203        | 366        | 2791                      | 1.206                   | 0.952             | 78.932                                         | 13.114       | 7.954        |
|            | Replicate 6     | 348075          | 345308        | 233          | 2167        | 367        | 2767                      | 0.795                   | 0.623             | 78.316                                         | 13.263       | 8.421        |
|            |                 | Mean±s.d.       |               |              |             |            |                           |                         | 1.092±0.233       | 0.852±0.179                                    | 78.091±1.416 | 14.355±1.508 |
| 3          | Empty vector    | 100677          | 100662        | 4            | 9           | 2          | 15                        | 0.015                   |                   |                                                |              |              |
|            | Control Venus   | 100712          | 99079         | 5            | 8           | 1620       | 1633                      | 1.621                   |                   |                                                |              |              |
|            | Control mCherry | 100673          | 99677         | 990          | 5           | 1          | 996                       | 0.989                   |                   |                                                |              |              |
|            | Replicate 1     | 374093          | 371723        | 186          | 1881        | 303        | 2370                      | 0.634                   | 0.503             | 79.367                                         | 12.785       | 7.848        |
|            | Replicate 2     | 380307          | 377928        | 145          | 1940        | 294        | 2379                      | 0.626                   | 0.510             | 81.547                                         | 12.358       | 6.095        |
|            | Replicate 3     | 292266          | 289888        | 132          | 1972        | 274        | 2378                      | 0.814                   | 0.675             | 82.927                                         | 11.522       | 5.551        |
|            | Replicate 4     | 218046          | 215653        | 112          | 1910        | 371        | 2393                      | 1.097                   | 0.876             | 79.816                                         | 15.504       | 4.680        |
|            | Replicate 5     | 279028          | 276622        | 138          | 1937        | 331        | 2406                      | 0.862                   | 0.694             | 80.507                                         | 13.757       | 5.736        |
|            | Replicate 6     | 179012          | 176633        | 140          | 1892        | 347        | 2379                      | 1.329                   | 1.057             | 79.529                                         | 14.586       | 5.885        |
|            |                 | Mean±s.d.       |               |              |             |            |                           |                         | 0.894±0.275       | 0.719±0.215                                    | 80.616±1.386 | 13.419±1.480 |

|           |                 |         |         |      |      |      |      |             |             |              |              |              |
|-----------|-----------------|---------|---------|------|------|------|------|-------------|-------------|--------------|--------------|--------------|
| 4         | Empty vector    | 100000  | 100000  | 0    | 0    | 0    | 0    | 0           |             |              |              |              |
|           | Control Venus   | 100000  | 99020   | 5    | 3    | 972  | 980  | 0.980       |             |              |              |              |
|           | Control mCherry | 100000  | 99794   | 205  | 1    | 0    | 206  | 0.206       |             |              |              |              |
|           | Replicate 1     | 459409  | 456258  | 383  | 2359 | 409  | 3151 | 0.686       | 0.513       | 74.865       | 12.980       | 12.155       |
|           | Replicate 2     | 412692  | 409512  | 375  | 2388 | 417  | 3180 | 0.771       | 0.579       | 75.094       | 13.113       | 11.792       |
|           | Replicate 3     | 837030  | 833626  | 480  | 2436 | 488  | 3404 | 0.407       | 0.291       | 71.563       | 14.336       | 14.101       |
|           | Replicate 4     | 402481  | 399267  | 481  | 2387 | 346  | 3214 | 0.799       | 0.593       | 74.269       | 10.765       | 14.966       |
|           | Replicate 5     | 332644  | 329608  | 357  | 2352 | 327  | 3036 | 0.913       | 0.707       | 77.470       | 10.771       | 11.759       |
|           | Replicate 6     | 582324  | 579008  | 502  | 2398 | 416  | 3316 | 0.569       | 0.412       | 72.316       | 12.545       | 15.139       |
| Mean±s.d. |                 |         |         |      |      |      |      | 0.691±0.180 | 0.516±0.147 | 74.263±2.118 | 12.418±1.410 | 13.319±1.597 |
| 5         | Empty vector    | 100000  | 99986   | 8    | 5    | 1    | 14   | 0.014       |             |              |              |              |
|           | Control Venus   | 100000  | 99573   | 4    | 2    | 421  | 427  | 0.427       |             |              |              |              |
|           | Control mCherry | 100000  | 99983   | 16   | 1    | 0    | 17   | 0.017       |             |              |              |              |
|           | Replicate 1     | 464014  | 461024  | 294  | 2300 | 396  | 2990 | 0.644       | 0.496       | 76.923       | 13.244       | 9.833        |
|           | Replicate 2     | 425876  | 423064  | 259  | 2300 | 253  | 2812 | 0.660       | 0.540       | 81.792       | 8.997        | 9.211        |
|           | Replicate 3     | 616927  | 613484  | 411  | 2300 | 732  | 3443 | 0.558       | 0.373       | 66.802       | 21.261       | 11.937       |
|           | Replicate 4     | 598473  | 595286  | 342  | 2300 | 545  | 3187 | 0.533       | 0.384       | 72.168       | 17.101       | 10.731       |
|           | Replicate 5     | 491626  | 488340  | 355  | 2300 | 631  | 3286 | 0.668       | 0.468       | 69.994       | 19.203       | 10.803       |
|           | Replicate 6     | 801753  | 798352  | 434  | 2300 | 667  | 3401 | 0.424       | 0.287       | 67.627       | 19.612       | 12.761       |
| Mean±s.d. |                 |         |         |      |      |      |      | 0.581±0.095 | 0.425±0.093 | 72.551±5.805 | 16.57±4.623  | 10.879±1.309 |
| 6         | Empty vector    | 100262  | 100248  | 9    | 4    | 1    | 14   | 0.014       |             |              |              |              |
|           | Control Venus   | 100194  | 99427   | 3    | 0    | 764  | 767  | 0.766       |             |              |              |              |
|           | Control mCherry | 100000  | 99676   | 324  | 0    | 0    | 324  | 0.324       |             |              |              |              |
|           | Replicate 1     | 1172129 | 1168353 | 697  | 2517 | 562  | 3776 | 0.322       | 0.215       | 66.658       | 14.883       | 18.459       |
|           | Replicate 2     | 780326  | 776622  | 645  | 2520 | 539  | 3704 | 0.475       | 0.323       | 68.035       | 14.552       | 17.414       |
|           | Replicate 3     | 1036442 | 1032768 | 645  | 2513 | 516  | 3674 | 0.354       | 0.242       | 68.400       | 14.045       | 17.556       |
|           | Replicate 4     | 725427  | 721735  | 692  | 2511 | 489  | 3692 | 0.509       | 0.346       | 68.012       | 13.245       | 18.743       |
|           | Replicate 5     | 757172  | 753425  | 709  | 2531 | 507  | 3747 | 0.495       | 0.334       | 67.547       | 13.531       | 18.922       |
|           | Replicate 6     | 697333  | 693820  | 643  | 2460 | 410  | 3513 | 0.504       | 0.353       | 70.026       | 11.671       | 18.303       |
| Mean±s.d. |                 |         |         |      |      |      |      | 0.443±0.083 | 0.302±0.059 | 68.113±1.113 | 13.654±1.148 | 18.233±0.620 |
| 7         | Empty vector    | 12243   | 12230   | 7    | 5    | 1    | 13   | 0.106       |             |              |              |              |
|           | Control Venus   | 100000  | 98740   | 15   | 9    | 1236 | 1260 | 1.260       |             |              |              |              |
|           | Control mCherry | 100000  | 98809   | 1185 | 4    | 2    | 1191 | 1.191       |             |              |              |              |
|           | Replicate 1     | 161940  | 160433  | 322  | 981  | 204  | 1507 | 0.931       | 0.606       | 65.096       | 13.537       | 21.367       |
|           | Replicate 2     | 155693  | 154319  | 172  | 1000 | 202  | 1374 | 0.883       | 0.642       | 72.780       | 14.702       | 12.518       |
|           | Replicate 3     | 123025  | 121624  | 186  | 1000 | 215  | 1401 | 1.139       | 0.813       | 71.378       | 15.346       | 13.276       |
|           | Replicate 4     | 163206  | 162117  | 174  | 783  | 132  | 1089 | 0.667       | 0.480       | 71.901       | 12.121       | 15.978       |
|           | Replicate 5     | 258248  | 256791  | 233  | 1000 | 224  | 1457 | 0.564       | 0.387       | 68.634       | 15.374       | 15.992       |
|           | Replicate 6     | 122506  | 121096  | 202  | 1000 | 208  | 1410 | 1.151       | 0.816       | 70.922       | 14.752       | 14.326       |
| Mean±s.d. |                 |         |         |      |      |      |      | 0.889±0.240 | 0.624±0.173 | 70.119±2.826 | 14.305±1.260 | 15.576±3.165 |

**Table S4. List of primers used to build *Capsaspora* expression vectors with reporter genes.** Restriction enzymes sites are underlined. CoNMM sequence plus 7 extra aminoacids is highlighted in red.

| Region/Gene                                | <i>Capsaspora</i> gene ID | Primer name | Sequence 5'-3'                                                                                                    |
|--------------------------------------------|---------------------------|-------------|-------------------------------------------------------------------------------------------------------------------|
| <i>CoEF1<math>\alpha</math></i> promoter   | CAOG_07807                | 1           | CTGGTACCAAATGCACAGTTAGCAACGACC                                                                                    |
|                                            |                           | 2           | <u>GATATCACTAGTCCC</u> GGGATCCTGTGAAGGTTGTTCTG                                                                    |
|                                            |                           | 3           | AAATGCACAGTTAGCAACGACC                                                                                            |
| <i>CoEF1<math>\alpha</math></i> terminator | CAOG_07807                | 4           | GAGCTGTACAAGTAAATTTTGTGTTTGCCAAG                                                                                  |
|                                            |                           | 5           | CATTGCTAGTGCTGTTCTCACC                                                                                            |
|                                            |                           | 6           | GACCGCGGTGAGAACAGCACTAGCAATG                                                                                      |
|                                            |                           | 7           | <u>CCCGGGACTAGTGATATCTGAATTTTGTGTTTGCCAAGACAC</u>                                                                 |
|                                            |                           | 8           | CGCCAGTGTGATGGATTGAAAGCTTCCGCGGTGA                                                                                |
| <i>mCherry/Venus</i>                       | -                         | 9           | <u>CCCGGGACTAGTGATATCATGGT</u> GAGCAAGGGCG                                                                        |
|                                            |                           | 10          | CTTGGCAAACACAAAATTTACTTGTACAGCTC                                                                                  |
| <i>CoSrc2</i> NMM                          | CAOG_06360                | 11          | TATAC <u>CCGGGATGGGCTGCTCCA</u> ACTCTAAACCGCACGACCCGTCGGATTCAAGGTTTCCCTTCTGGCGTTGCGTCCAACAGCATGGTGAGCAAGGGCGAGGAG |
|                                            |                           | 12          | TTACTTGTACAGCTCGTCCATG                                                                                            |
| <i>CoH2B</i>                               | CAOG_01818                | 13          | TAC <u>CCGGGATGCCGCCGA</u> AGGTC                                                                                  |
|                                            |                           | 14          | TAACTAGTCTTGGCGCCGGAGGT                                                                                           |
| Lifeact                                    | -                         | 15          | <u>CCCGGGACCATGGGTGTGGCAGACCTGATTAAGAAGTTCGAGAGCATT</u>                                                           |
|                                            |                           | 16          | <u>TCTAGATGGTGGGTCA</u> CCCTCCTCCTTGCTAATGCTCTCGAACTTCTT                                                          |
